# Supplementary material
Source: Springer Nature journal article supplement (https://www.springermedizin.de/resource/supplementary/13017_2009_150_MOESM1_ESM.pdf/9635576)

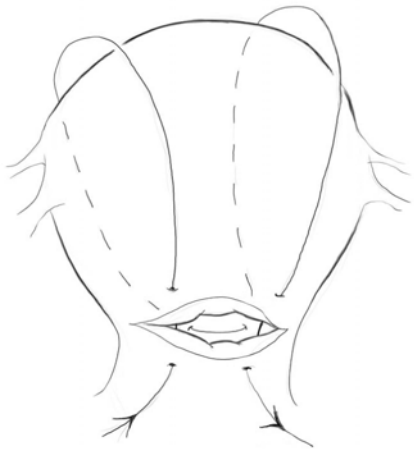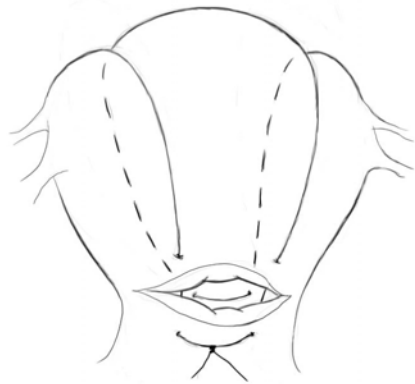

Supplement: MOESM1 [file 9635576]
